# Supplementary material for: Metal-free porous phosphorus-doped g-C3N4 photocatalyst achieving efficient synthesis of benzoin
Source: Royal Society of Chemistry journal article supplement (doi:10.1039/d1ra00701g), 2021-01-01
Supplement: d1ra00701g1.pdf [file d1ra00701g1.pdf]

## Supplementary Information

### Metal-free Porous Phosphorus-Doped g-C<sub>3</sub>N<sub>4</sub> Photocatalyst Achieving

### Efficient Synthesis of Benzoin

Yuanjin Li,<sup>a</sup> Shuhui Wang,<sup>\*a</sup> Jin Wu,<sup>b</sup> Qiuyan Wang,<sup>a</sup> Changqiu Ma,<sup>a</sup>  
Daheng Jiang,<sup>a</sup> Wanglai Hu,<sup>\*c</sup> Lixin Zhu,<sup>\*b</sup> and Xiaoliang Xu<sup>\*a</sup>

<sup>a</sup> School of Physical Sciences, University of Science and Technology of  
China, Hefei Anhui 230026, PR China

<sup>b</sup> Department of General Surgery & Central Laboratory, the First Affiliated  
Hospital of Anhui Medical University, Hefei Anhui 230022, PR China

<sup>c</sup> Translational Research Institute of Henan Provincial People's Hospital,  
Molecular Pathology Center of Academy of Medical Science, Zhengzhou  
University, Zhengzhou Henan 450003, PR China

E-mail addresses: Shuhui Wang (wsh2016@mail.ustc.edu.cn); Wanglai Hu  
(wanglaihu@ahmu.edu.cn); Lixin Zhu (lx-zhu@163.com); Xiaoliang Xu  
(xlxu@ustc.edu.cn)

## SUPPLEMENTARY EXPERIMENT DETAILS

**Characterizations.** The X-ray diffraction (XRD) observation was conducted on a Philips X'Pert Pro Super diffractometer. The microstructures of catalysts were investigated through a FEI Sirion200 field emission scanning electron microscope (SEM) and a JEM-2100F transmission electron microscope (TEM), with energy-dispersive spectroscopy (EDS) mapping characterized on the same instrument. The Zeta potential was measured via Micromeritics NANOPLUS 3. X-ray photoelectron spectroscopy (XPS) was done on a VGESCALAB MK II spectrometer. N<sub>2</sub> adsorption isotherms were recorded from an ASAP 2020 M PLUS analyzer. The ultraviolet–visible (UV–vis) spectra were acquired from a Perkin Elmer Lambda950 spectrophotometer. Photoluminescence (PL) spectra were evaluated by an Edinburgh FLS920 fluorescence spectrometer. X-ray absorption near edge structure (XANES) spectra were executed in the National Synchrotron Radiation Laboratory (NSRL) in Hefei, China.

## SUPPLEMENTARY FIGURES

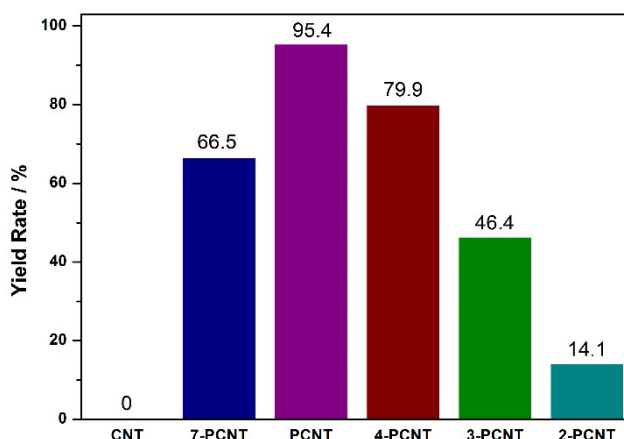

**Figure S1.** Yield rate of benzoin on PCNT with different phosphorus doping concentration within 6 h.

In order to determine the optimal doping content of phosphorus in PCNT for synthesis of benzoin, a series of PCNT, i.e., 7-PCNT, 4-PCNT, 3-PCNT and 2-PCNT were synthesized, following the same procedure as that of PCNT except that the mass ratio of 2-aminoethylphosphonic acid (AEP): melamine (ME) was changed to 1/70, 1/40, 1/30 and 1/20, respectively. Then the effect of mass ratio (AEP:ME) on the photocatalytic benzoin synthesis activity was investigated. As shown in Fig.S1, the highest yield rate of benzoin is 95.4%, which is achieved at the mass ratio of 1/60 (PCNT). On basis of the above result, PCNT with the optimal mass ratio (AEP:ME) of 1/60 was selected for investigation in this work.

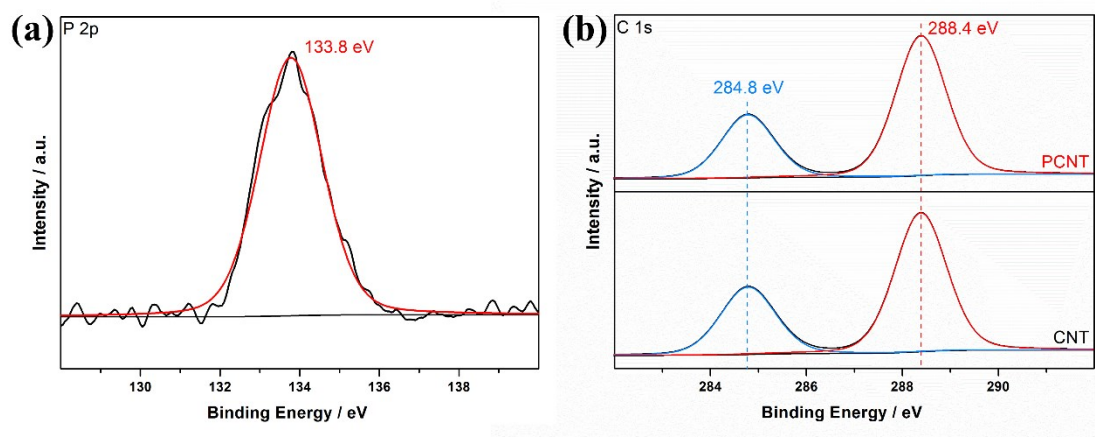

**Figure S2.** (a) XPS P 2p spectra of PCNT. (b) XPS C 1s spectra of PCNT and CNT.

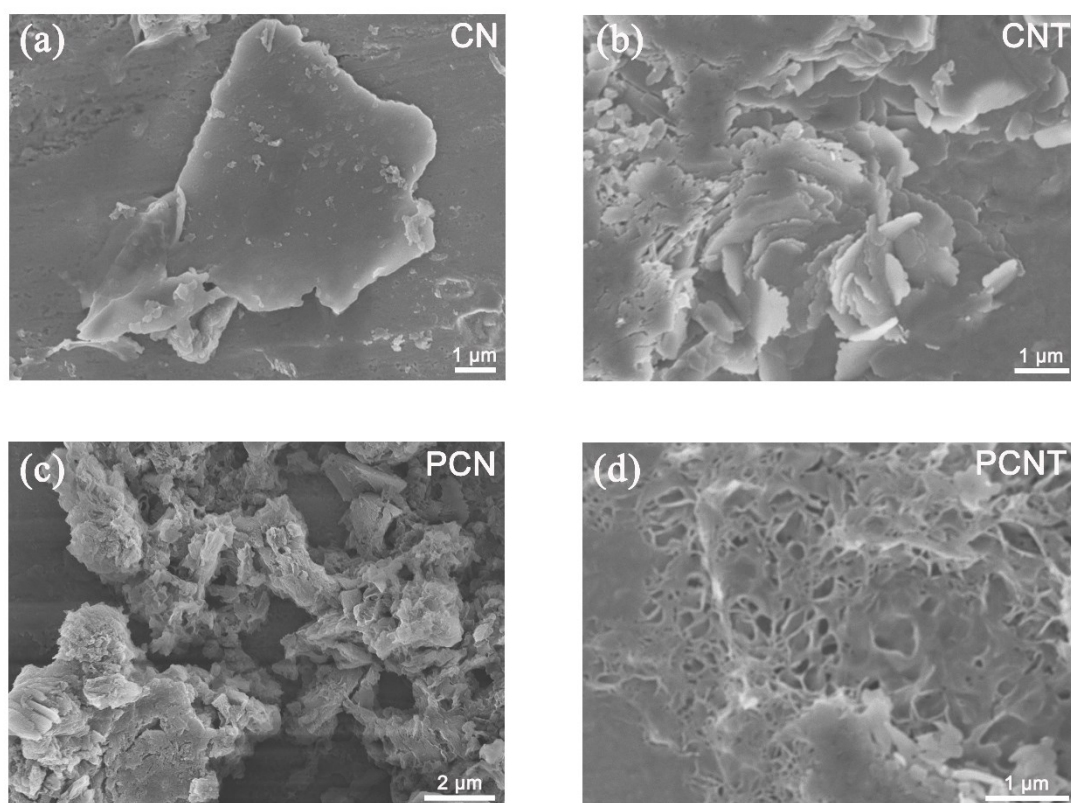

**Figure S3.** (a-d) SEM images of (a) CN, (b) CNT, (c) PCN, and (d) PCNT.

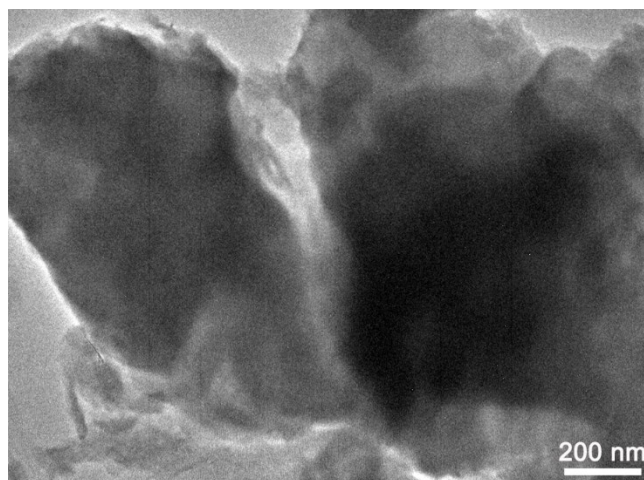

**Figure S4.** TEM image of CN.

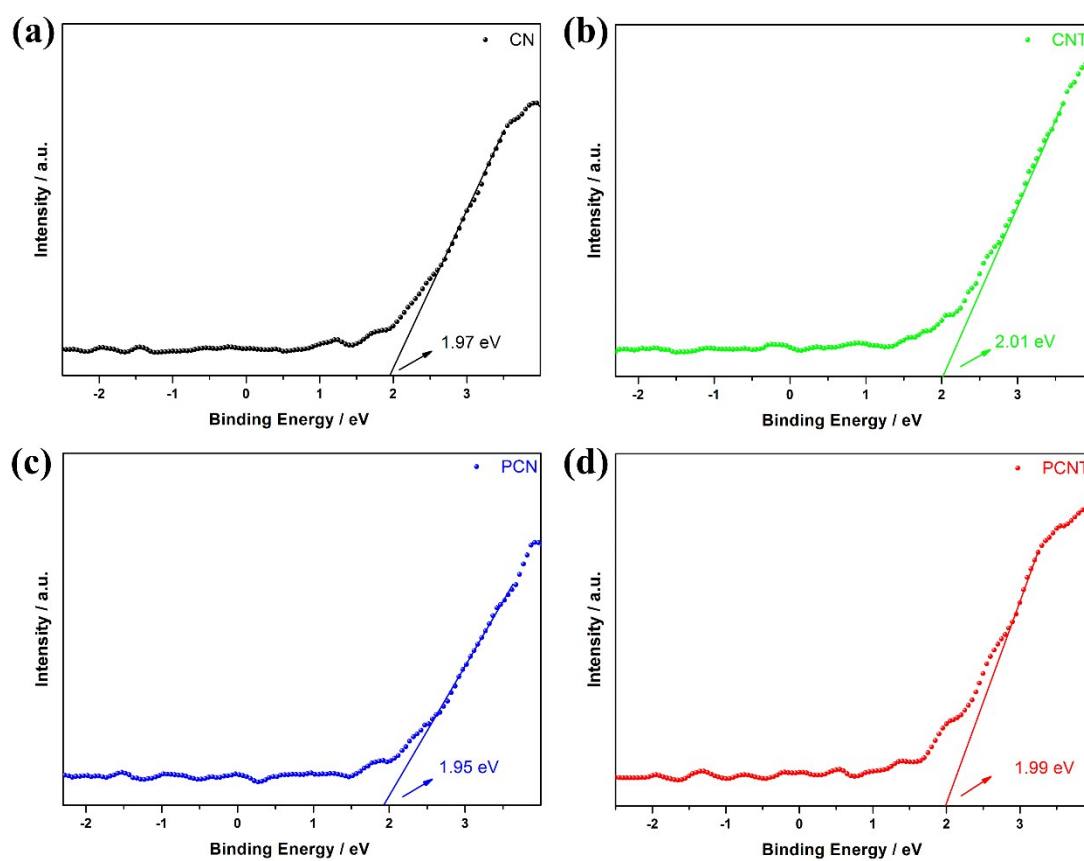

**Figure S5.** (a-d) XPS valence band spectra of (a) CN, (b) CNT, (c) PCN, and (d) PCNT.

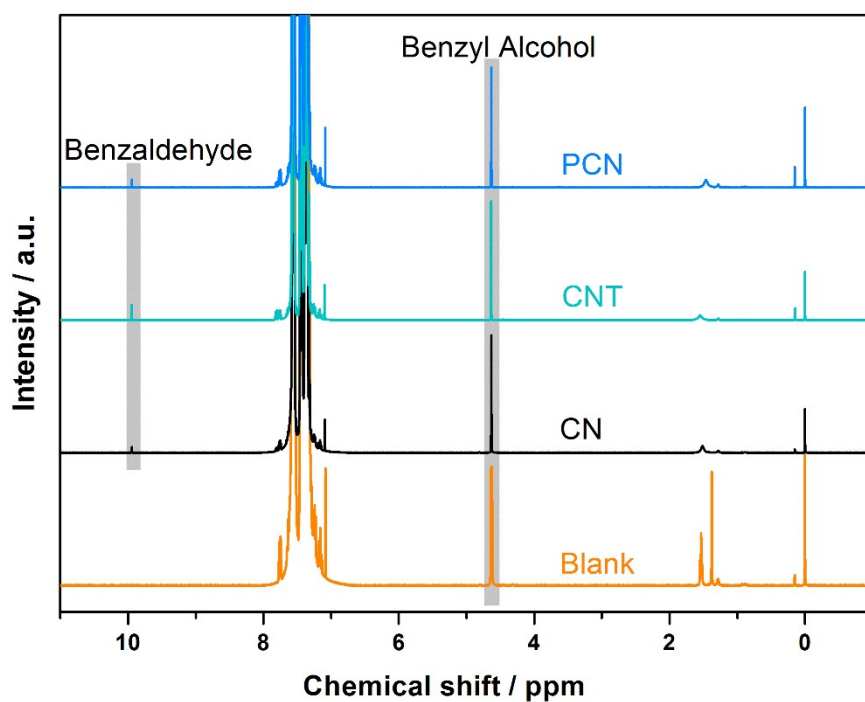

**Figure S6.** Representative  $^1\text{H}$  NMR spectra of photocatalytic reaction process on CN, CNT, and PCN within 6 h.

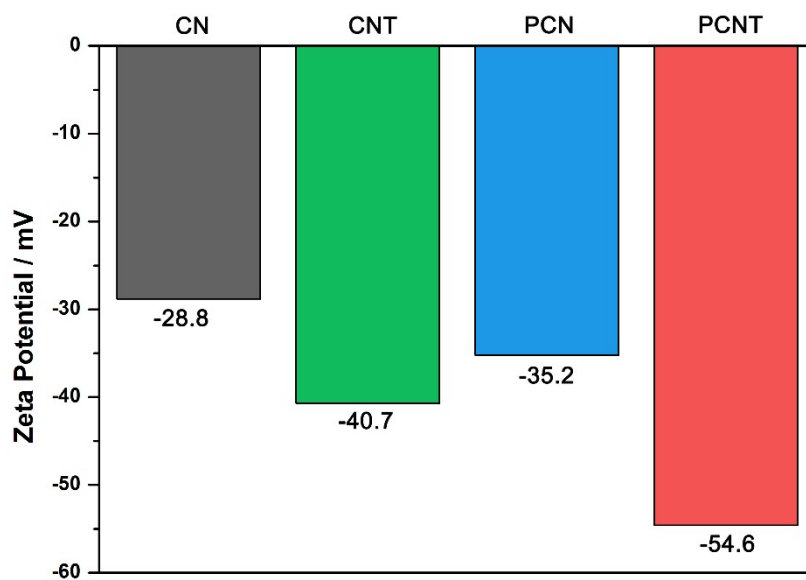

**Figure S7.** Zeta Potential of CN, CNT, PCN, and PCNT.
